# Supplementary material
Source: Elsevier journal article supplement (https://comptes-rendus.academie-sciences.fr/chimie/article/10.1016/j.crci.2010.11.011/file/attach/mmc1.pdf)

# Intermolecular cyclisation of isosorbide in basic condition by DMC chemistry

Pietro Tundo,<sup>a,b,\*</sup> Fabio Aricò,<sup>a,b</sup> Guillaume Gauthier,<sup>c</sup> Franco Benetollo,<sup>b</sup> Agostino Baldacci<sup>d</sup>

<sup>a</sup> Interuniversity Consortium "Chemistry for the Environment"; Via delle Industrie 21/8 30175 Marghera Venice (Italy); <sup>b</sup> Ca' Foscari Università di Venezia; Dipartimento Scienze Ambientali, Dorsoduro 2137 - 30123 Venice (Italy); <sup>c</sup> École Nationale Supérieure de Chimie de Paris (ENSCP - Chimie ParisTech), 11 rue Pierre et Marie Curie, 75005 Paris, France, <sup>d</sup>

## Supporting information

### General Information:

Proton Nuclear Magnetic Resonance spectra (<sup>1</sup>H NMR) were recorded at 300 MHz on a Bruker 300 Ultra Shield apparatus. The chemical shifts are reported in ppm from the solvent resonance as the internal standard (CDCl<sub>3</sub>: 7.26 ppm) and regarding the tetramethylsilane (TMS). Data are reported as follows: chemical shift, integration multiplicity (s = singlet, d = doublet, t = triplet, q = quartet, qui = quintet, sext = sextet, sept = septet, br = board, m = multiplet) and coupling constants (Hz). Carbon Nuclear Magnetic Resonance spectra (<sup>13</sup>C NMR) were recorded at 75 MHz on a Bruker apparatus 300 Ultra Shield. Chemical shift are reported in ppm from the solvent resonance as internal standard (CDCl<sub>3</sub>: 77 ppm). Analytical chromatography (TLC) was performed on Merck precoated TLC plates (silica gel 60 GF254, 0.25 mm). Flash column chromatography was performed on silica gel 60Å grade 9385 (Merck 230-400 mesh). GC-MS analysis were performed on a Agilent 6890N Gas Chromatograph equipped with HP-5MS 30 m x 0.25 mm column and Agilent 5973 Network Mass selective detector. All the reaction were performed using dimethylcarbonate (Aldrich, 99% purity) dried on molecular sieves 4Å. K<sub>2</sub>CO<sub>3</sub> was bought by Aldrich and dried at 90°C in a vacuum oven prior to use. KW2000 was bought by Kyowa chemical industry company ltd , calcinated at 500°C and conserved at 80°C in an oven. All the bases and catalysts were purchased by Aldrich and used without further purification. The other simple chemicals were used as such.

NMR  $^1\text{H}$   
 GG1-136-1  
 $\text{CDCl}_3$  300 MHz  
**Cyclic compound**

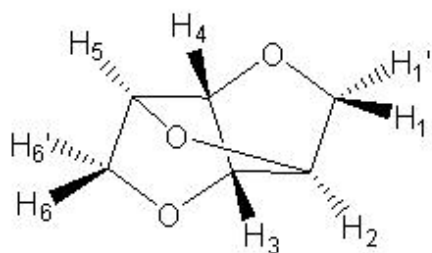

| chemical shift (ppm) | integration | multiplicity | coupling (Hz) | attribution |
|----------------------|-------------|--------------|---------------|-------------|
| 4.54                 | 2           | s            | -             | 2-5         |
| 4.46                 | 2           | s            | -             | 3-4         |
| 3.98                 | 2           | d            | 3.6           | 1-6         |
| 3.88                 | 2           | d            | 6             | 1'-6'       |

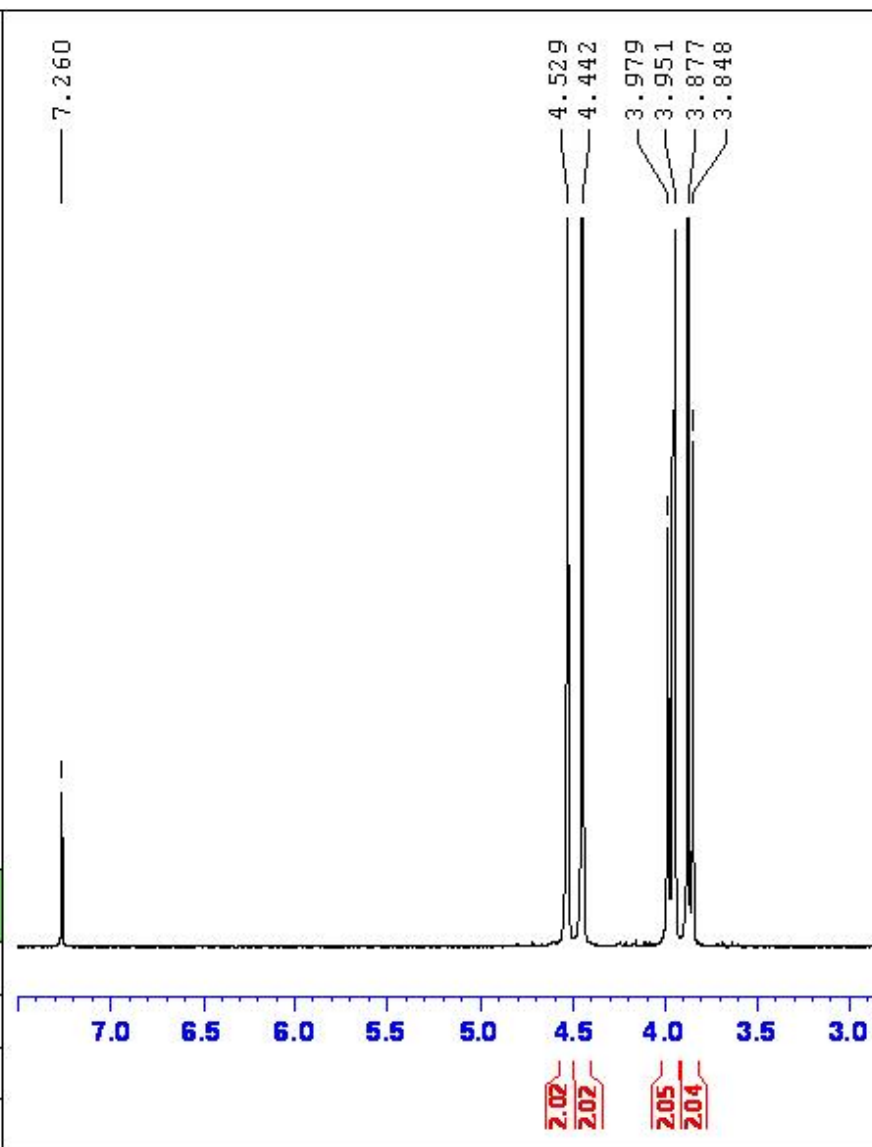

NMR 1H COSY  
GG1-136-2 COSY  
CDCl<sub>3</sub> 300 MHz  
**Cyclic compound**

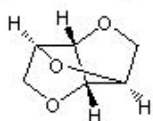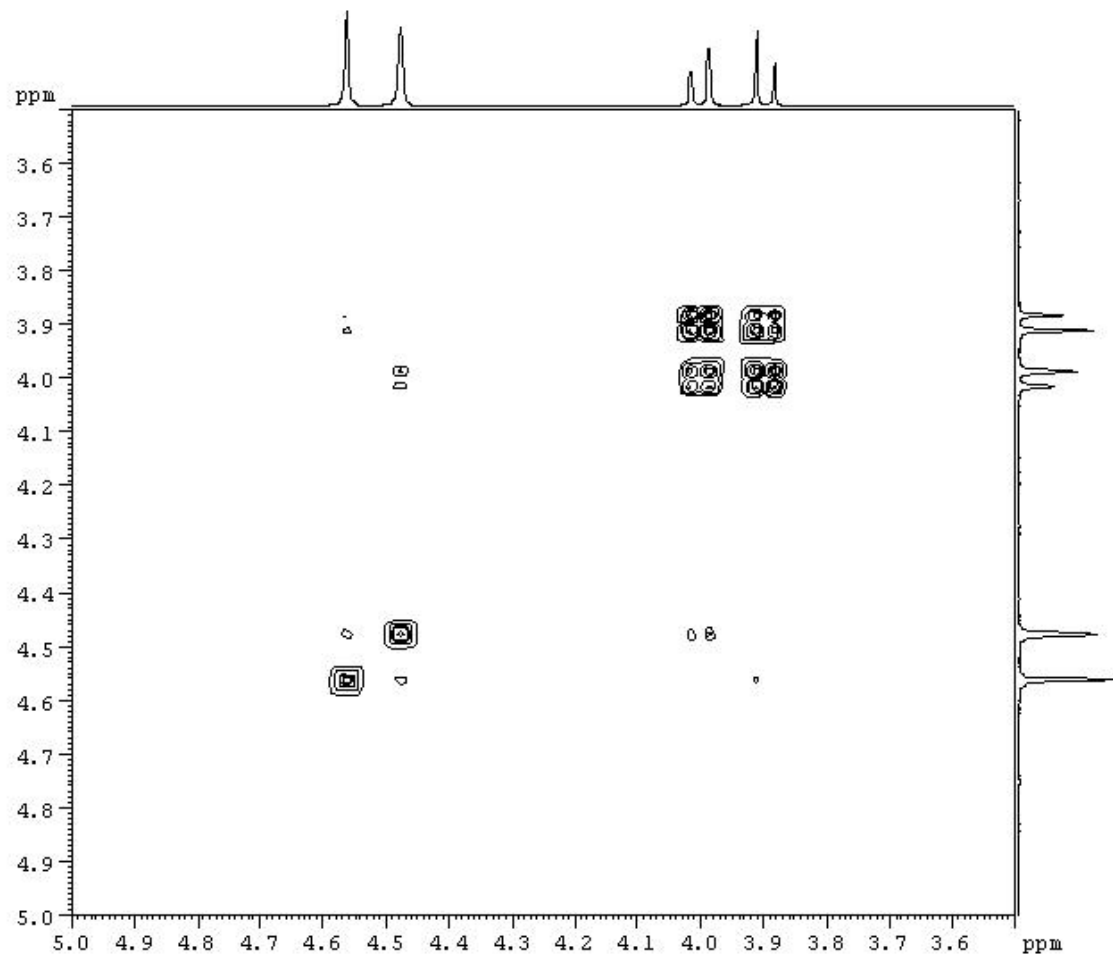

NMR 13C  
GG1-136-3 C13  
CDCl<sub>3</sub> 75 MHz  
**Cyclic compound**

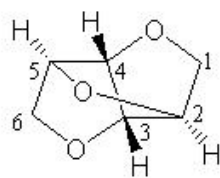

| chemical shift (ppm) | attribution |
|----------------------|-------------|
| 81.6                 | 3-4         |
| 76.8                 | 2-5         |
| 73.2                 | 1-6         |

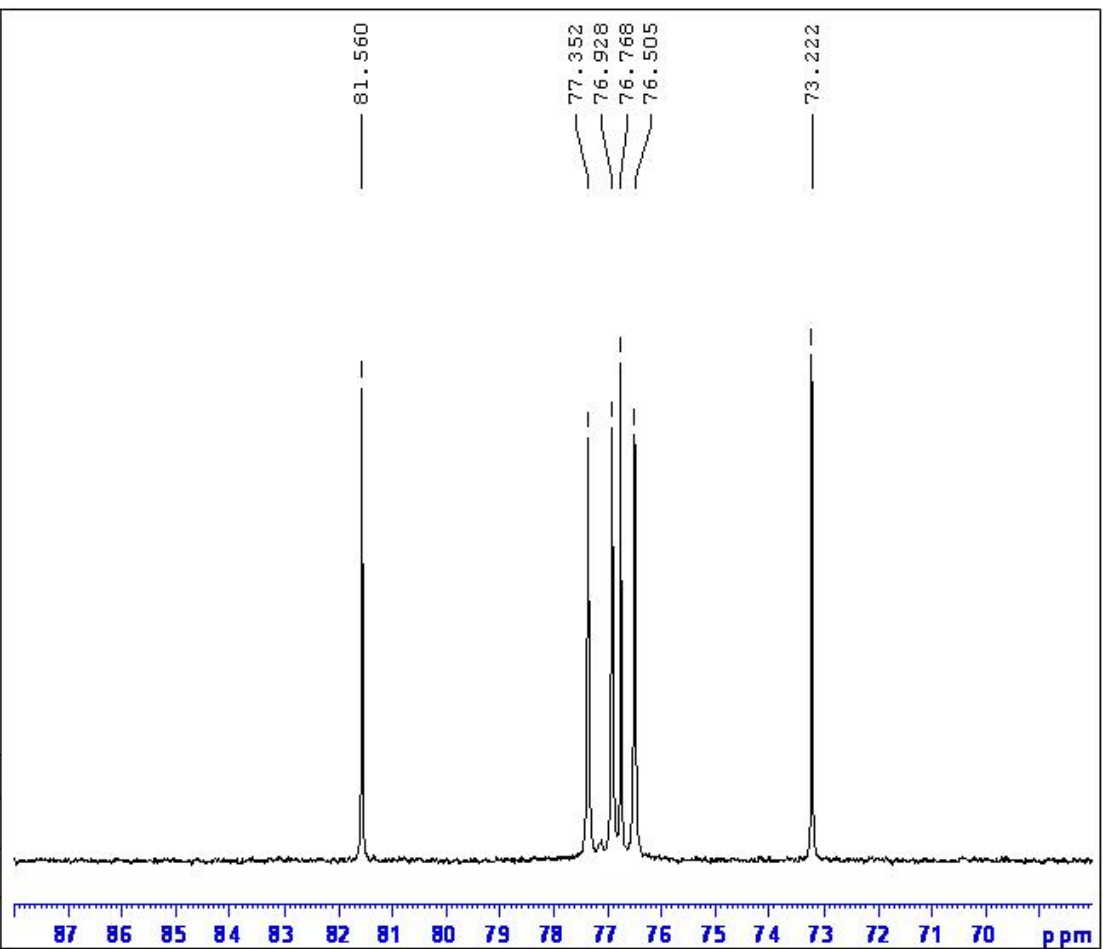

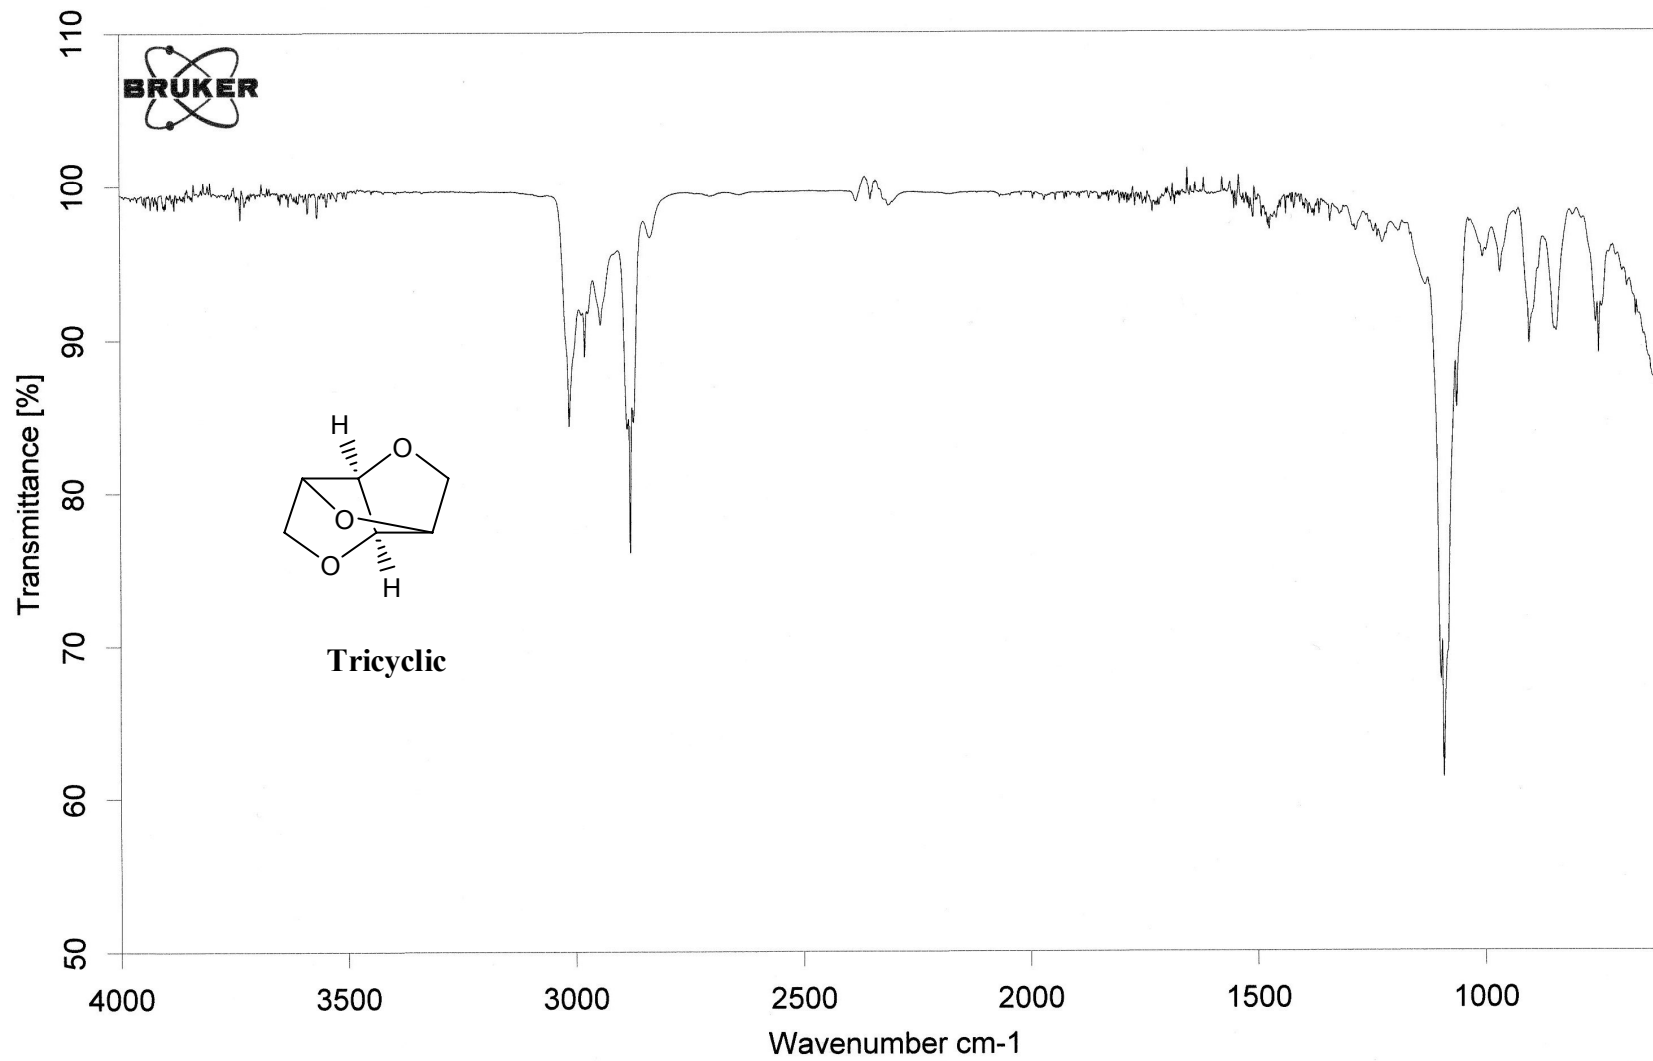

C:\BALDAN\Derivato DMI\_9 mg a ca. 125 C.0

Nuovo campione del derivato di DMI

9 mg di cristalli bianchi, sotto vuoto e a ca.125 °C, in 02/02/2010

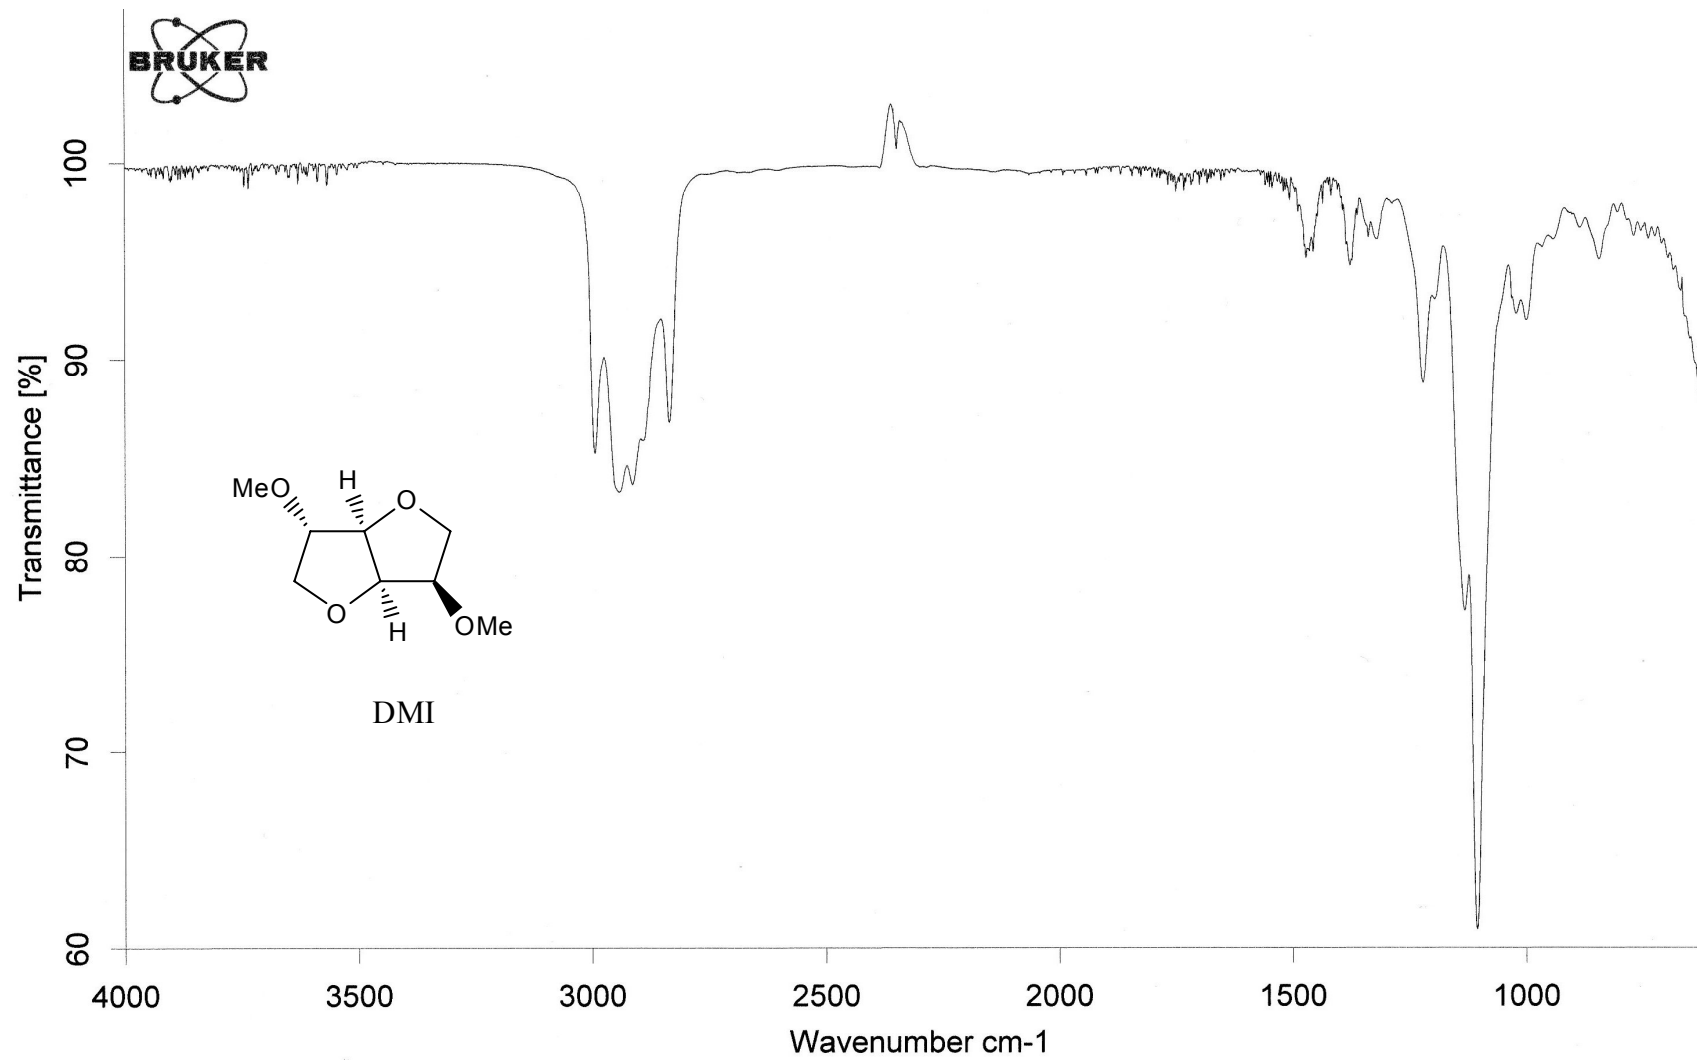

C:\BALDANTundo\_Dimethyl isorbide (liquido) e Derivato (solido)\2' DMI\Nuovo campione di DMI\_20 micro L a 125 C.0

Nuovo campione di

02/02/2010

File : D:\DATA MSD\ARCHIVES\GUILLAUME\TETRACYCLIC COMPOUND\TETRACYC.D  
Operator : guillaume  
Acquired : 14 Jul 2009 15:28 using AcqMethod FABIO  
Instrument : Instrumen  
Sample Name:  
Misc Info :  
Vial Number: 1

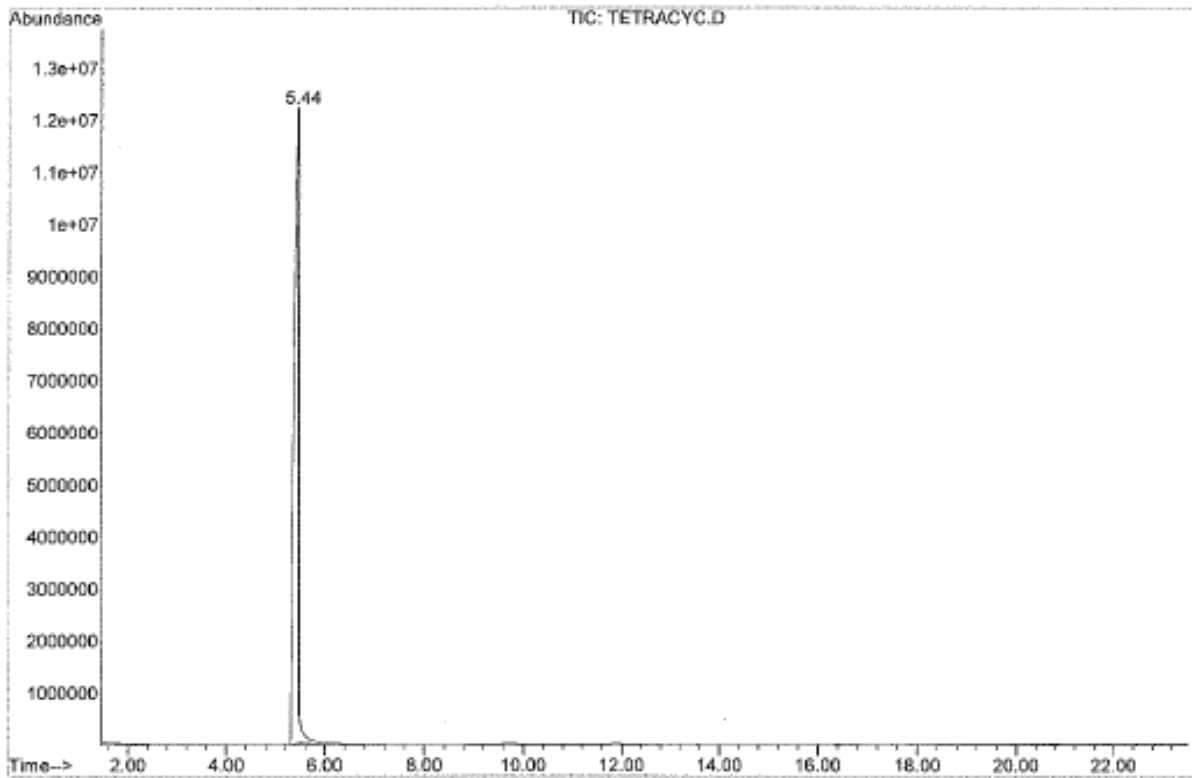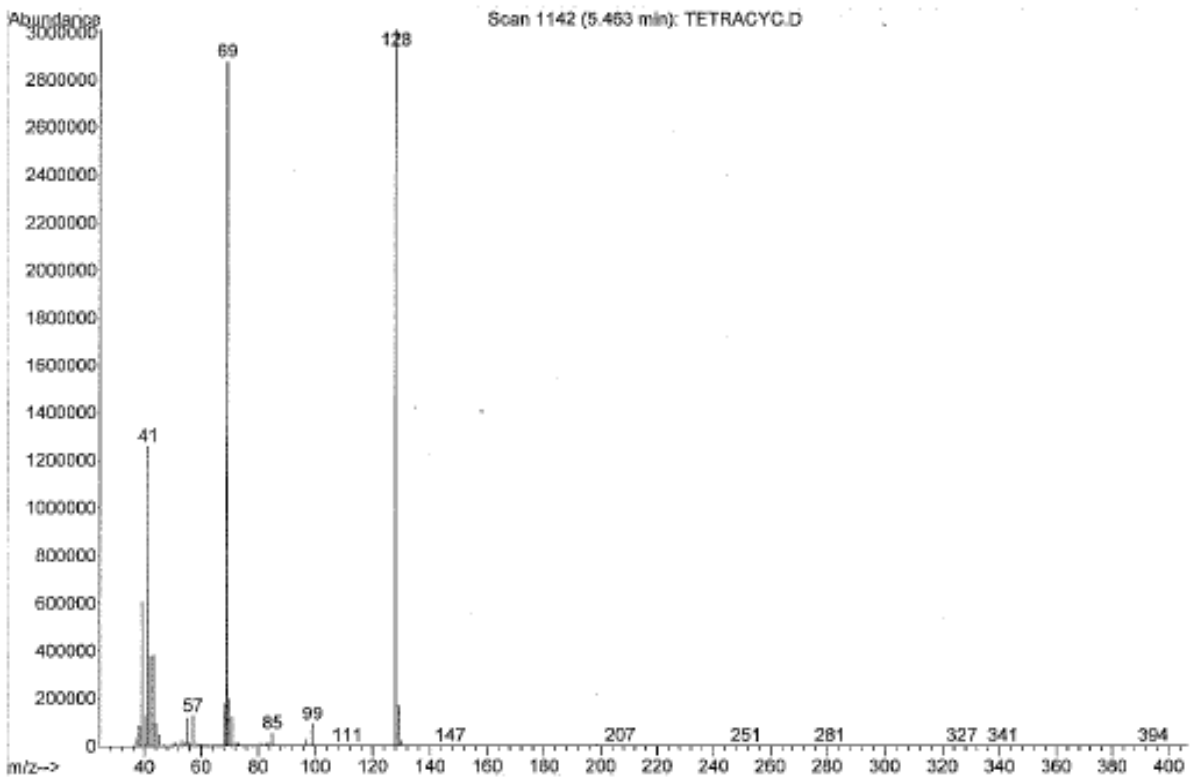

Supplement: mmc1 [file mmc1.pdf]
